# Supplementary material
Source: Springer Nature journal article supplement (https://www.springermedizin.de/resource/supplementary/12882_2013_772_MOESM3_ESM.pdf/9454686)

**a****Single addition of P**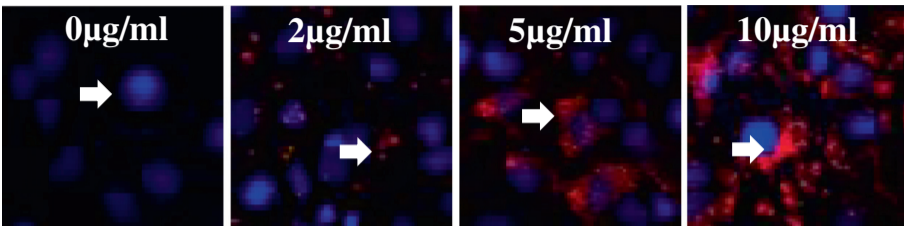**b****Single addition of fH**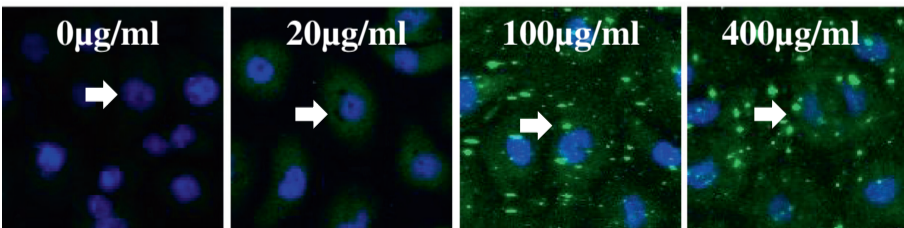

Supplement: MOESM3 [file 9454686]
